# Supplementary material for: Ionospheric shock waves triggered by rockets
Source: Copernicus journal article supplement (doi:10.5194/angeo-32-1145-2014), 2014-09-16
Supplement: Supplementary file 1 [file angeo-32-1145-2014-supplement.zip]

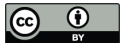

## *Supplement of*

# **Ionospheric shock waves triggered by rockets**

**C. H. Lin et al.**

*Correspondence to:* C. H. Chen (koichi0925@gmail.com)

- Supplement-Cover-Letter.pdf
- supplement
  - NK\_TIDmovie\_260km.wmv
  - SK\_TIDmovie\_300km.wmv
  - Thumbs.db
